# Supplementary material for: Photosynthetic Photon Flux Density Effects on Portulaca olearacea in Controlled-Environment Agriculture
Source: MDPI journal article supplement (doi:10.3390/plants12203622), 2023-10-20
Supplement: s1 [file s1]

**Supplement 1a.** Pearson correlation matrix of parameters, measured in green *Portulaca olearacea*. Determination coefficient values in bold are statistically significant when  $p \leq 0.05$ .

| Variables    | PPFD          | Height        | Leaf area     | Dry weight    | Fresh weight  | Chl      | Flav          | NBI           | DPPH          | TPC           | FRAP          |
|--------------|---------------|---------------|---------------|---------------|---------------|----------|---------------|---------------|---------------|---------------|---------------|
| PPFD         | <b>1</b>      | <b>0,977</b>  | <b>0,973</b>  | <b>0,983</b>  | <b>0,988</b>  | -0,039   | <b>0,917</b>  | <b>-0,901</b> | <b>0,905</b>  | <b>0,941</b>  | <b>0,947</b>  |
| Height       | <b>0,977</b>  | <b>1</b>      | <b>0,956</b>  | <b>0,984</b>  | <b>0,986</b>  | -0,077   | <b>0,874</b>  | <b>-0,858</b> | <b>0,856</b>  | <b>0,890</b>  | <b>0,916</b>  |
| Leaf area    | <b>0,973</b>  | <b>0,956</b>  | <b>1</b>      | <b>0,979</b>  | <b>0,983</b>  | -0,168   | <b>0,923</b>  | <b>-0,932</b> | <b>0,833</b>  | <b>0,888</b>  | <b>0,892</b>  |
| Dry weight   | <b>0,983</b>  | <b>0,984</b>  | <b>0,979</b>  | <b>1</b>      | <b>0,998</b>  | -0,174   | <b>0,891</b>  | <b>-0,905</b> | <b>0,840</b>  | <b>0,878</b>  | <b>0,912</b>  |
| Fresh weight | <b>0,988</b>  | <b>0,986</b>  | <b>0,983</b>  | <b>0,998</b>  | <b>1</b>      | -0,159   | <b>0,899</b>  | <b>-0,907</b> | <b>0,845</b>  | <b>0,886</b>  | <b>0,907</b>  |
| Chl          | -0,039        | -0,077        | -0,168        | -0,174        | -0,159        | <b>1</b> | 0,066         | 0,209         | 0,281         | 0,246         | 0,158         |
| Flav         | <b>0,917</b>  | <b>0,874</b>  | <b>0,923</b>  | <b>0,891</b>  | <b>0,899</b>  | 0,066    | <b>1</b>      | <b>-0,949</b> | <b>0,871</b>  | <b>0,911</b>  | <b>0,890</b>  |
| NBI          | <b>-0,901</b> | <b>-0,858</b> | <b>-0,932</b> | <b>-0,905</b> | <b>-0,907</b> | 0,209    | <b>-0,949</b> | <b>1</b>      | <b>-0,789</b> | <b>-0,831</b> | <b>-0,845</b> |
| DPPH         | <b>0,905</b>  | <b>0,856</b>  | <b>0,833</b>  | <b>0,840</b>  | <b>0,845</b>  | 0,281    | <b>0,871</b>  | <b>-0,789</b> | <b>1</b>      | <b>0,984</b>  | <b>0,951</b>  |
| TPC          | <b>0,941</b>  | <b>0,890</b>  | <b>0,888</b>  | <b>0,878</b>  | <b>0,886</b>  | 0,246    | <b>0,911</b>  | <b>-0,831</b> | <b>0,984</b>  | <b>1</b>      | <b>0,967</b>  |
| FRAP         | <b>0,947</b>  | <b>0,916</b>  | <b>0,892</b>  | <b>0,912</b>  | <b>0,907</b>  | 0,158    | <b>0,890</b>  | <b>-0,845</b> | <b>0,951</b>  | <b>0,967</b>  | <b>1</b>      |

**Supplement 1b.** Pearson correlation matrix of parameters, measured in golden *Portulaca olearacea*. Determination coefficient values in bold are statistically significant, when  $p \leq 0.05$ .

| Variables    | PPFD          | Height        | Leaf area     | Dry weight    | Fresh weight  | Chl           | Flav          | NBI           | DPPH         | TPC          | FRAP         |
|--------------|---------------|---------------|---------------|---------------|---------------|---------------|---------------|---------------|--------------|--------------|--------------|
| PPFD         | <b>1</b>      | <b>0,884</b>  | <b>0,822</b>  | <b>0,989</b>  | <b>0,979</b>  | <b>-0,753</b> | <b>0,877</b>  | <b>-0,931</b> | -0,318       | 0,014        | 0,286        |
| Height       | <b>0,884</b>  | <b>1</b>      | <b>0,810</b>  | <b>0,864</b>  | <b>0,878</b>  | -0,502        | <b>0,811</b>  | <b>-0,777</b> | -0,289       | -0,071       | 0,156        |
| Leaf area    | <b>0,822</b>  | <b>0,810</b>  | <b>1</b>      | <b>0,849</b>  | <b>0,909</b>  | <b>-0,587</b> | <b>0,672</b>  | <b>-0,748</b> | -0,463       | -0,337       | -0,082       |
| Dry weight   | <b>0,989</b>  | <b>0,864</b>  | <b>0,849</b>  | <b>1</b>      | <b>0,989</b>  | <b>-0,789</b> | <b>0,881</b>  | <b>-0,951</b> | -0,350       | -0,029       | 0,247        |
| Fresh weight | <b>0,979</b>  | <b>0,878</b>  | <b>0,909</b>  | <b>0,989</b>  | <b>1</b>      | <b>-0,767</b> | <b>0,833</b>  | <b>-0,919</b> | -0,416       | -0,129       | 0,147        |
| Chl          | <b>-0,753</b> | -0,502        | <b>-0,587</b> | <b>-0,789</b> | <b>-0,767</b> | <b>1</b>      | -0,553        | <b>0,873</b>  | 0,271        | 0,074        | -0,158       |
| Flav         | <b>0,877</b>  | <b>0,811</b>  | <b>0,672</b>  | <b>0,881</b>  | <b>0,833</b>  | -0,553        | <b>1</b>      | <b>-0,881</b> | -0,100       | 0,166        | 0,422        |
| NBI          | <b>-0,931</b> | <b>-0,777</b> | <b>-0,748</b> | <b>-0,951</b> | <b>-0,919</b> | <b>0,873</b>  | <b>-0,881</b> | <b>1</b>      | 0,203        | -0,020       | -0,304       |
| DPPH         | -0,318        | -0,289        | -0,463        | -0,350        | -0,416        | 0,271         | -0,100        | 0,203         | <b>1</b>     | <b>0,812</b> | <b>0,713</b> |
| TPC          | 0,014         | -0,071        | -0,337        | -0,029        | -0,129        | 0,074         | 0,166         | -0,020        | <b>0,812</b> | <b>1</b>     | <b>0,928</b> |
| FRAP         | 0,286         | 0,156         | -0,082        | 0,247         | 0,147         | -0,158        | 0,422         | -0,304        | <b>0,713</b> | <b>0,928</b> | <b>1</b>     |
